# Supplementary material for: In silico identification of protein targets for chemical neurotoxins using ToxCast in vitro data and read-across within the QSAR toolbox
Source: Royal Society of Chemistry journal article supplement (doi:10.1039/c7tx00268h), 2018-01-01
Supplement: c7tx00268h1.xlsx [file c7tx00268h1.xlsx]

## Sheet: Gene_100act_functions
Protein name	Gene name	Neuronal functions	Nervous System diseases	N activ. chemicals
Estrogen receptor 1 (alpha)	ESR1	neuron projection; negative regulation of neuron death	Alzheimer Disease; Psychoses, Substance-Induced; Migraine Disorders; Peripheral Nervous System Diseases	453
HLA class II histocompatibility antigen, DR alpha chain	HLA-DRA	cognition	Multiple Sclerosis; Parkinson disease	414
C-C motif chemokine	CCL2	astrocyte cell migration; neuronal cell body; positive regulation of synaptic transmission	Schizophrenia; Hyperalgesia; Brain Injuries; Brain Ischemia; Status Epilepticus; Spinal Dysraphism	386
Jun proto-oncogene	JUN	brain development; neuromuscular junction; axon regeneration; neuronal cell body	Peripheral Nervous System Diseases; Brain Ischemia; Status Epilepticus	284
Transforming growth factor beta-1	TGFB1	myelination; neuronal cell body	Diabetic Neuropathies; Stroke; Muscular Diseases; Muscular Dystrophy	227
Early growth response 1	EGR1	learning or memory; long-term synaptic potentiation; positive regulation of neuron apoptotic process	Brain Ischemia; Cocaine-Related Disorders	217
Sodium-dependent dopamine transporter	SLC6A3	neuronal cell body; dopamine transport; regulation of dopamine metabolic process; locomotory behavior	Attention Deficit disorder; Schizophrenia;Paranoid Disorders; Anxiety disorders; Dementia; Parkinson Disease;	209
Retinoic acid receptor alpha	RARA	regulation of myelination; neuronal cell body; regulation of synaptic plasticity	Sciatic Neuropathy	196
Translocator protein	TSPO	behavioral response to pain; peripheral nervous system axon regeneration	Hepatic Encephalopathy	195
Paired box 6	PAX6	axon guidance; brain development; negative regulation of neuron differentiation; neuron migration	Intellectual Disability; Autistic Disorder; Nervous System Malformations	184
Retinoic acid receptor RXR-beta	RXRB	regulation of myelination		176
Intercellular adhesion molecule 1	ICAM1	immunological synapse; sensory perception of sound	Stroke; Brain Ischemia; Peripheral Nervous System Diseases; Multiple Sclerosis	162
Tissue-type plasminogen activator	PLAT	regulation of synaptic plasticity; synaptic transmission, glutamatergic	Neurotoxicity Syndromes; Cerebral Hemorrhage; Back Pain; Brain Ischemia; Stroke	162
Interleukin-6	IL6	positive regulation of transmission of nerve impulse; positive regulation of neuron differentiation; negative regulation of neuron death	Schizophrenia; Depressive Disorder; Autistic Disorder; Amnesia; Seizures; Peripheral Nervous System Diseases	157
Androgen receptor	AR	axon	Autistic disorder; Bulbospinal neuronopathy	156
Mu-type opioid receptor	OPRM1	excitatory postsynaptic potential; neuropeptide signaling pathway; sensory perception; locomotory behavior	Alcoholism; Epilepsy; Hyperalgesia; Neuraglia; Suizures; Movement Disorders; Psychoses, Substance-Induced	139
Hypoxia inducible factor 1 alpha subunit	HIF1A	axonal transport of mitochondrion; dopaminergic neuron differentiation; visual learning	Hypoxia-Ischemia, Brain; Spinal Cord Injuries	136
5-hydroxytryptamine receptor 7	HTR7	behavioral response to pain; dopaminergic neuron differentiation; long-term synaptic potentiation; memory; serotonin receptor signaling pathway	Learning Disorders; Memory Disorders; Depressive Disorder; Schizophrenia; Anxiety Disorders; Pain	120
Epidermal growth factor receptor	EGFR	brain development; learning or memory; neuron projection morphogenesis		119
Sodium voltage-gated channel alpha subunit 1	SCN1A	adult walking behavior; neuromuscular process controlling posture; neuronal action potential; sodium ion transmembrane transport	Seizures, Febrile; Epilepsy; Movement Disorders; Migraine	117
Progesterone receptor	PGR	axon terminus; neuron projection	Meningioma;	114
Dopamine receptor D1	DRD1	associative learning; dopamine receptor signaling pathway; hippocampus development; long-term synaptic potentiation; neuronal action potential	Bipolar Disorder; Schizophrenia; Autistic Disorder; Movement Disorders; Catalepsy; Seizures; Parkinson Disease	107
