# Supplementary material for: In silico identification of protein targets for chemical neurotoxins using ToxCast in vitro data and read-across within the QSAR toolbox
Source: Royal Society of Chemistry journal article supplement (doi:10.1039/c7tx00268h), 2018-01-01
Supplement: c7tx00268h2.xlsx [file c7tx00268h2.xlsx]

## Sheet: Classification
Assay name	Gene name	Protein name	Neuronal functions	Assay type	Assay endpoint	Assay organism	N active pyrethroids
ATG_DR5_CIS	RARA, RARB, RARG	Retinoic acid receptors alpha, beta, gamma	regulation of myelination; neuronal cell body; regulation of synaptic plasticity	Cell-based	Transcription factor activity	Human	10
ATG_ERE_CIS	ESR1	Estrogen receptor 1 (alpha)	neuron projection; negative regulation of neuron death	Cell-based	Transcription factor activity	Human	5
ATG_ERa_TRANS	ESR1	Estrogen receptor 1 (alpha)	neuron projection; negative regulation of neuron death	Cell-based	Transcription factor activity	Human	7
ATG_RARa_TRANS	RARA	Retinoic acid receptor alpha	regulation of myelination; neuronal cell body; regulation of synaptic plasticity	Cell-based	Transcription factor activity	Human	6
BSK_3C_HLADR	HLA-DRA	HLA class II histocompatibility antigen, DR alpha chain	cognition	Cell-based	Changes in protein expression level	Human	9
BSK_3C_MCP1	CCL2	C-C motif chemokine	astrocyte cell migration; neuronal cell body; positive regulation of synaptic transmission	Cell-based	Changes in protein expression level	Human	5
BSK_4H_MCP1	CCL2	C-C motif chemokine	astrocyte cell migration; neuronal cell body; positive regulation of synaptic transmission	Cell-based	Changes in protein expression level	Human	5
BSK_SAg_MCP1	CCL2	C-C motif chemokine	astrocyte cell migration; neuronal cell body; positive regulation of synaptic transmission	Cell-based	Changes in protein expression level	Human	6
NVS_ENZ_hBACE	BACE1	Beta-secretase 1	memory; modulation of chemical synaptic transmission; regulation of synaptic plasticity;	Biochemical	Enzymatic activity	Human	7
NVS_GPCR_h5HT7	HTR7	5-hydroxytryptamine receptor 7	dopaminergic neuron differentiation; long-term synaptic potentiation; memory; serotonin receptor signaling pathway	Biochemical	Receptor-ligand binding	Human	5
NVS_GPCR_hDRD1	DRD1	Dopamine receptor D1	associative learning; hippocampus development; long-term synaptic potentiation; neuronal action potential	Biochemical	Receptor-ligand binding	Human	5
NVS_GPCR_mCCKA	CCKAR	Cholecystokinin A receptor	forebrain development; neuron migration;	Biochemical	Receptor-ligand binding	Mouse	5
NVS_TR_hDAT	SLC6A3	Sodium-dependent dopamine transporter	neuronal cell body; dopamine transport; regulation of dopamine metabolic process; locomotory behavior	Biochemical	Receptor-ligand binding	Human	9
NVS_TR_gDAT	SLC6A3	Sodium-dependent dopamine transporter	neuronal cell body; dopamine transport; regulation of dopamine metabolic process; locomotory behavior	Biochemical	Receptor-ligand binding	Guinea pig	5
