# Supplementary material for: In silico identification of protein targets for chemical neurotoxins using ToxCast in vitro data and read-across within the QSAR toolbox
Source: Royal Society of Chemistry journal article supplement (doi:10.1039/c7tx00268h), 2018-01-01
Supplement: c7tx00268h3.xlsx [file c7tx00268h3.xlsx]

## Sheet: AC50 for Pyrethrins
Assays	Protein	N active	Cyfluthrin		Permethrin		Cypermethrin		Fenpropathrin		Tetramethrin		Resmethrin		Prallethrin		S-Bioallethrin		Allethrin		Tefluthrin		Esfenvalerate		Bifenthrin
			ToxCast	Predicted	ToxCast	Predicted	ToxCast	Predicted	ToxCast	Predicted	ToxCast	Predicted	ToxCast	Predicted	ToxCast	Predicted	ToxCast	Predicted	ToxCast	Predicted	ToxCast	Predicted	ToxCast	Predicted	ToxCast	Predicted
ATG_DR5_CIS	RARA, RARB, RARG	10	1.05	1.62	2.55	2.51	3.55	2.4	1.74	1.13	Inactive	0.963	2.93	2.05	2.75	1.14	0.762	1.48	0.26	1.89	4.06	1.43	2.63	2.71	Inactive	1.81
ATG_ERE_CIS	ESR1	5	Inactive	5.84	9.13	4.59	5.6	5.6	2.79	5.36	Inactive	Inactive	Inactive	4.55	Inactive	Inactive	Inactive	Inactive	2.11	4.79	Inactive	5.63	Inactive	Inactive	10.6	4.86
ATG_ERa_TRANS	ESR1	7	Inactive	Inactive	8.6	6.97	9.72	8.05	6.81	5.32	Inactive	Inactive	6.46	6.2	Inactive	Inactive	Inactive	Inactive	Inactive	Inactive	20.4	6.36	2.86	7.87	5.14	7.06
ATG_RARa_TRANS	RARA	6	Inactive	2.62	Inactive	2.95	3.23	3.35	3.75	2.64	Inactive	2	Inactive	Inactive	1.57	2.62	1.12	2.82	Inactive	Inactive	13.9	2.52	2.06	3.71	Inactive	Inactive
BSK_3C_HLADR	HLA-DRA	9	Inactive	Inactive	2.32	3.67	Inactive	5.68	Inactive	6.61	6.64	5.13	2.48	3.04	9.44	3.66	7.94	4.43	4.65	4.93	4.78	3.4	4	5.29	1.91	5.57
BSK_3C_MCP1	CCL2	5	Inactive	Inactive	Inactive	Inactive	Inactive	Inactive	Inactive	Inactive	2.93	6.3	2.7	6.69	9.82	4.17	9.89	4.2	4.87	5.01	Inactive	Inactive	Inactive	Inactive	Inactive	Inactive
BSK_4H_MCP1	CCL2	5	2.87	5.47	Inactive	Inactive	2.88	5.19	Inactive	Inactive	Inactive	3.67	Inactive	Inactive	4.89	3.02	5.72	2.93	3.58	3.3	Inactive	Inactive	Inactive	Inactive	Inactive	Inactive
BSK_SAg_MCP1	CCL2	6	2.94	6.78	Inactive	Inactive	Inactive	Inactive	Inactive	Inactive	4.93	4.42	3.47	4.87	4.44	4.01	5.02	3.95	7.52	3.64	Inactive	Inactive	Inactive	Inactive	Inactive	Inactive
NVS_ENZ_hBACE	BACE1	7	1.59	4.06	16	4.04	Inactive	Inactive	0.778	3.6	7.8	3.82	12.9	3.21	Inactive	Inactive	Inactive	Inactive	Inactive	Inactive	10.9	5.21	0.576	8.54	Inactive	5.37
NVS_GPCR_h5HT7	HTR7	5	Inactive	6.23	8.77	5.02	3.35	6.91	10.4	4.18	Inactive	Inactive	8.5	4.22	Inactive	Inactive	Inactive	Inactive	Inactive	Inactive	Inactive	6.01	1.91	8.04	Inactive	6.08
NVS_GPCR_hDRD1	DRD1	5	Inactive	Inactive	4.21	6.95	Inactive	Inactive	Inactive	Inactive	19.9	3.83	4.59	5.67	Inactive	Inactive	6.74	4.48	1.66	6.36	Inactive	Inactive	Inactive	Inactive	Inactive	Inactive
NVS_GPCR_mCCKA	CCKAR	5	Inactive	Inactive	Inactive	Inactive	8.58	8.66	6.48	7.46	Inactive	6.88	Inactive	Inactive	6.15	6.26	6.91	6.13	6.51	6.22	Inactive	Inactive	Inactive	Inactive	Inactive	Inactive
NVS_TR_hDAT	SLC6A3	9	0.953	2.91	Inactive	4.14	3.75	4.68	4.25	1.66	Inactive	1.68	11.1	2.94	4.5	1.89	7.24	1.73	0.105	4.03	4.49	2.09	8.01	2.61	Inactive	2.77
NVS_TR_gDAT	SLC6A3	5	Inactive	Inactive	Inactive	Inactive	4.91	8.14	6.83	6.02	Inactive	5.86	Inactive	Inactive	3	6.13	7.91	4.85	8.67	4.74	Inactive	Inactive	Inactive	Inactive	Inactive	Inactive
