# Supplementary material for: In silico identification of protein targets for chemical neurotoxins using ToxCast in vitro data and read-across within the QSAR toolbox
Source: Royal Society of Chemistry journal article supplement (doi:10.1039/c7tx00268h), 2018-01-01
Supplement: c7tx00268h4.xlsx [file c7tx00268h4.xlsx]

## Sheet: Classification of Pyrethrins
Assays	Protein	N active	Cyfluthrin		Permethrin		Cypermethrin		Fenpropathrin		Tetramethrin		Resmethrin		Prallethrin		S-Bioallethrin		Allethrin		Tefluthrin		Esfenvalerate		Bifenthrin
			ToxCast	Predicted	ToxCast	Predicted	ToxCast	Predicted	ToxCast	Predicted	ToxCast	Predicted	ToxCast	Predicted	ToxCast	Predicted	ToxCast	Predicted	ToxCast	Predicted	ToxCast	Predicted	ToxCast	Predicted	ToxCast	Predicted
ATG_DR5_CIS	RARA, RARB, RARG	10	Active	Active	Active	Active	Active	Active	Active	Active	Inactive	Active	Active	Active	Active	Active	Active	Active	Active	Active	Active	Active	Active	Active	Inactive	Active
ATG_ERE_CIS	ESR1	5	Inactive	Active	Active	Active	Active	Active	Active	Active	Inactive	Inactive	Inactive	Active	Inactive	Inactive	Inactive	Inactive	Active	Inactive	Inactive	Active	Inactive	Inactive	Active	Inactive
ATG_ERa_TRANS	ESR1	7	Inactive	Inactive	Active	Active	Active	Active	Active	Active	Inactive	Inactive	Active	Active	Inactive	Inactive	Inactive	Inactive	Inactive	Inactive	Active	Active	Active	Active	Active	Active
ATG_RARa_TRANS	RARA	6	Inactive	Active	Inactive	Active	Active	Active	Active	Inactive	Inactive	Active	Inactive	Inactive	Active	Inactive	Active	Inactive	Inactive	Inactive	Active	Inactive	Active	Inactive	Inactive	Inactive
BSK_3C_HLADR	HLA-DRA	9	Inactive	Inactive	Active	Active	Inactive	Active	Inactive	Active	Active	Active	Active	Active	Active	Active	Active	Active	Active	Active	Active	Active	Active	Inactive	Active	Active
BSK_3C_MCP1	CCL2	5	Inactive	Inactive	Inactive	Inactive	Inactive	Inactive	Inactive	Inactive	Active	Active	Active	Inactive	Active	Active	Active	Active	Active	Active	Inactive	Inactive	Inactive	Inactive	Inactive	Inactive
BSK_4H_MCP1	CCL2	5	Active	Active	Inactive	Inactive	Active	Inactive	Inactive	Inactive	Inactive	Active	Inactive	Inactive	Active	Active	Active	Active	Active	Active	Inactive	Inactive	Inactive	Inactive	Inactive	Inactive
BSK_SAg_MCP1	CCL2	6	Active	Active	Inactive	Inactive	Inactive	Inactive	Inactive	Inactive	Active	Active	Active	Inactive	Active	Active	Active	Active	Active	Active	Inactive	Inactive	Inactive	Inactive	Inactive	Inactive
NVS_ENZ_hBACE	BACE1	7	Active	Active	Active	Active	Inactive	Inactive	Active	Active	Active	Inactive	Active	Active	Inactive	Inactive	Inactive	Inactive	Inactive	Inactive	Active	Active	Active	Active	Inactive	Active
NVS_GPCR_h5HT7	HTR7	5	Inactive	Active	Active	Active	Active	Active	Active	Active	Inactive	Inactive	Active	Active	Inactive	Inactive	Inactive	Inactive	Inactive	Inactive	Inactive	Active	Active	Active	Inactive	Active
NVS_GPCR_hDRD1	DRD1	5	Inactive	Inactive	Active	Inactive	Inactive	Inactive	Inactive	Inactive	Active	Active	Active	Inactive	Inactive	Inactive	Active	Active	Active	Active	Inactive	Inactive	Inactive	Inactive	Inactive	Inactive
NVS_GPCR_mCCKA	CCKAR	5	Inactive	Inactive	Inactive	Inactive	Active	Inactive	Active	Active	Inactive	Active	Inactive	Inactive	Active	Active	Active	Active	Active	Active	Inactive	Inactive	Inactive	Inactive	Inactive	Inactive
NVS_TR_hDAT	SLC6A3	9	Active	Active	Inactive	Active	Active	Active	Active	Active	Inactive	Active	Active	Active	Active	Active	Active	Active	Active	Active	Active	Active	Active	Active	Inactive	Active
NVS_TR_gDAT	SLC6A3	5	Inactive	Inactive	Inactive	Inactive	Active	Inactive	Active	Active	Inactive	Active	Inactive	Inactive	Active	Active	Active	Active	Active	Active	Inactive	Inactive	Inactive	Inactive	Inactive	Inactive
